# Supplementary material for: Comparative genomic analysis of the aldehyde dehydrogenase gene superfamily in Arabidopsis thaliana – searching for the functional key to hypoxia tolerance
Source: Front Plant Sci. 2022 Nov 17;13:1000024. doi: 10.3389/fpls.2022.1000024 (PMC9714362; doi:10.3389/fpls.2022.1000024)
Supplement: Supplementary file 1 [file Table_1.xlsx]

## Sheet: Sheet1
Chr1	AT1G23800.1.Araport11.447	==	Gm01	Glyma.01G031500.1.Wm82.a4.v1
Chr1	AT1G23800.1.Araport11.447	==	Gm02	Glyma.02G034000.1.Wm82.a4.v1
Chr1	AT1G74920.1.Araport11.447	==	Gm05	Glyma.05G033500.2.Wm82.a4.v1
Chr1	AT1G74920.1.Araport11.447	==	Gm06	Glyma.06G186300.1.Wm82.a4.v1
Chr1	AT1G23800.1.Araport11.447	==	Gm08	Glyma.08G288000.1.Wm82.a4.v1
Chr1	AT1G79440.1.Araport11.447	==	Gm08	Glyma.08G163700.2.Wm82.a4.v1
Chr1	AT1G79440.1.Araport11.447	==	Gm15	Glyma.15G263500.1.Wm82.a4.v1
Chr1	AT1G23800.1.Araport11.447	==	Gm18	Glyma.18G137300.1.Wm82.a4.v1
Chr2	AT2G14170.1.Araport11.447	==	Gm07	Glyma.07G183600.1.Wm82.a4.v1
Chr2	AT2G14170.1.Araport11.447	==	Gm08	Glyma.08G066600.1.Wm82.a4.v1
Chr2	AT2G14170.1.Araport11.447	==	Gm15	Glyma.15G058900.1.Wm82.a4.v1
Chr3	AT3G55610.1.Araport11.447	==	Gm02	Glyma.02G251100.1.Wm82.a4.v1
Chr3	AT3G48170.1.Araport11.447	==	Gm05	Glyma.05G033500.2.Wm82.a4.v1
Chr3	AT3G24503.1.Araport11.447	==	Gm05	Glyma.05G231800.1.Wm82.a4.v1
Chr3	AT3G48000.1.Araport11.447	==	Gm06	Glyma.06G183900.1.Wm82.a4.v1
Chr3	AT3G48170.1.Araport11.447	==	Gm06	Glyma.06G186300.1.Wm82.a4.v1
Chr3	AT3G24503.1.Araport11.447	==	Gm07	Glyma.07G087500.3.Wm82.a4.v1
Chr3	AT3G24503.1.Araport11.447	==	Gm08	Glyma.08G039200.1.Wm82.a4.v1
Chr3	AT3G24503.1.Araport11.447	==	Gm09	Glyma.09G189200.1.Wm82.a4.v1
Chr3	AT3G55610.1.Araport11.447	==	Gm14	Glyma.14G065600.1.Wm82.a4.v1
Chr3	AT3G48000.1.Araport11.447	==	Gm17	Glyma.17G091000.3.Wm82.a4.v1
Chr3	AT3G55610.1.Araport11.447	==	Gm18	Glyma.18G034300.1.Wm82.a4.v1
Chr4	AT4G36250.1.Araport11.447	==	Gm02	Glyma.02G051500.1.Wm82.a4.v1
Chr4	AT4G36250.1.Araport11.447	==	Gm16	Glyma.16G131700.1.Wm82.a4.v1
Chr1	AT1G23800.1.Araport11.447	==	SL4.0ch02	Solyc02g086970.4.1.ITAG4.0
Chr1	AT1G74920.1.Araport11.447	==	SL4.0ch03	Solyc03g113800.3.1.ITAG4.0
Chr1	AT1G23800.1.Araport11.447	==	SL4.0ch03	Solyc03g114150.3.1.ITAG4.0
Chr1	AT1G23800.1.Araport11.447	==	SL4.0ch05	Solyc05g005700.4.1.ITAG4.0
Chr1	AT1G74920.1.Araport11.447	==	SL4.0ch06	Solyc06g071290.3.1.ITAG4.0
Chr3	AT3G48170.1.Araport11.447	==	SL4.0ch03	Solyc03g113800.3.1.ITAG4.0
Chr3	AT3G48000.1.Araport11.447	==	SL4.0ch03	Solyc03g114150.3.1.ITAG4.0
Chr3	AT3G48170.1.Araport11.447	==	SL4.0ch06	Solyc06g071290.3.1.ITAG4.0
Chr3	AT3G24503.1.Araport11.447	==	SL4.0ch12	Solyc12g007030.3.1.ITAG4.0
Chr4	AT4G36250.1.Araport11.447	==	SL4.0ch02	Solyc02g084640.4.1.ITAG4.0
Chr5	AT5G62530.1.Araport11.447	==	SL4.0ch06	Solyc06g071290.3.1.ITAG4.0
Chr1	AT1G74920.1.Araport11.447	==	chr03	Soltu.DM.03G027730.1.v6.1
Chr1	AT1G23800.1.Araport11.447	==	chr05	Soltu.DM.05G008100.1.v6.1
Chr1	AT1G74920.1.Araport11.447	==	chr06	Soltu.DM.06G026410.1.v6.1
Chr3	AT3G48170.1.Araport11.447	==	chr03	Soltu.DM.03G027730.1.v6.1
Chr3	AT3G48000.1.Araport11.447	==	chr03	Soltu.DM.03G028090.1.v6.1
Chr3	AT3G48170.1.Araport11.447	==	chr03	Soltu.DM.03G027730.1.v6.1
Chr3	AT3G48170.1.Araport11.447	==	chr06	Soltu.DM.06G026410.1.v6.1
Chr3	AT3G24503.1.Araport11.447	==	chr12	Soltu.DM.12G024900.1.v6.1
Chr4	AT4G36250.1.Araport11.447	==	chr02	Soltu.DM.02G024450.1.v6.1
Chr5	AT5G62530.1.Araport11.447	==	chr06	Soltu.DM.06G026410.1.v6.1
Chr3	AT3G55610.1.Araport11.447	==	6	Zm00001d038358_T002.RefGen_V4
Chr3	AT3G55610.1.Araport11.447	==	8	Zm00001d012391_T003.RefGen_V4
spe289-Chr3	spe289-AT3G55610.1.Araport11.447	==	spe668-Chr1	spe668-LOC_Os01g62900.1.MSUv7.0
spe289-Chr3	spe289-AT3G55610.1.Araport11.447	==	spe668-Chr5	spe668-LOC_Os05g38150.2.MSUv7.0
